# Supplementary material for: Mechanistic modeling of a human IgG4 monoclonal antibody (tralokinumab) Fab‐arm exchange with endogenous IgG4 in healthy volunteers
Source: PubMed Central journal article supplement — CPT Pharmacometrics Syst Pharmacol. 2022 Jan 12;11(4):438–46. doi: 10.1002/psp4.12738 (PMC9007600; doi:10.1002/psp4.12738), 2022-01-12

## Supplemental Material

# Mechanistic Modeling of a Human IgG4 Monoclonal Antibody (Tralokinumab) Fab Arm Exchange with Endogenous IgG4 in Healthy Volunteers

B Wang J Goodman and LK Roskos

## DIFFERENTIAL EQUATION SYSTEMS AND INITIAL CONDITIONS

Endogenous IgG4 and half molecules

$$\frac{dXX}{dt} = K_{syn} - \frac{CL}{V_c} \cdot XX + \frac{k_{on}}{V_c} \cdot X \cdot X - k_{off} \cdot XX - \frac{Q}{V_c} \cdot XX + \frac{Q}{V_p} \cdot XX_p \quad (1)$$

$$\frac{dXX_p}{dt} = \frac{Q}{V_c} \cdot XX - \frac{Q}{V_p} \cdot XX_p \quad (2)$$

$$\frac{dX}{dt} = -\frac{CL_{hf}}{V_c} \cdot X - 2 \cdot \frac{k_{on}}{V_c} \cdot X \cdot X + 2 \cdot k_{off} \cdot XX - 2 \cdot \frac{k_{on}}{V_c} \cdot A \cdot X + k_{off} \cdot AX - \frac{Q}{V_c} \cdot X + \frac{Q}{V_p} \cdot X_p \quad (3)$$

$$\frac{dX_p}{dt} = \frac{Q}{V_c} \cdot X - \frac{Q}{V_p} \cdot X_p \quad (4)$$

Tralokinumab and half molecules

$$\frac{dAA}{dt} = -\frac{CL}{V_c} \cdot AA + \frac{k_{on}}{V_c} \cdot A \cdot A - k_{off} \cdot AA - \frac{Q}{V_c} \cdot AA + \frac{Q}{V_p} \cdot AA_p \quad (5)$$

$$\frac{dAA_p}{dt} = \frac{Q}{V_c} \cdot AA - \frac{Q}{V_p} \cdot AA_p \quad (6)$$

$$\frac{dA}{dt} = -\frac{CL_{hf}}{V_c} \cdot A - 2 \cdot \frac{k_{on}}{V_c} \cdot A \cdot A + 2 \cdot k_{off} \cdot AA - 2 \cdot \frac{k_{on}}{V_c} \cdot A \cdot X + k_{off} \cdot AX - \frac{Q}{V_c} \cdot A + \frac{Q}{V_p} \cdot A_p \quad (7)$$

$$\frac{dA_p}{dt} = \frac{Q}{V_c} \cdot A - \frac{Q}{V_p} \cdot A_p \quad (8)$$

Hybrid IgG4

$$\frac{dAX}{dt} = -\frac{CL}{V_c} \cdot AX + 2 \cdot \frac{k_{on}}{V_c} \cdot A \cdot X - k_{off} \cdot AX - \frac{Q}{V_c} \cdot AX + \frac{Q}{V_p} \cdot AX_p \quad (9)$$

$$\frac{dAX_p}{dt} = \frac{Q}{V_c} \cdot AX - \frac{Q}{V_p} \cdot AX_p \quad (10)$$

Total IgG<sub>4</sub>

$$DV = AA + XX + AX + \frac{1}{2}A + \frac{1}{2}X \quad (11)$$

Total tralokinumab

$$DV = AA + \frac{1}{2}A + \theta \cdot AX \quad (12)$$

Initial condition from total IgG<sub>4</sub> assay,

$$G_0 = IgG4_{baseline} \cdot V_c = XX_0 + \frac{1}{2}X_0 \quad (13)$$

$$X_0 = \frac{-(k_{hf}+k_{off}) + \sqrt{(k_{hf}+k_{off})^2 + 16 \cdot k_{on} \cdot k_{off} \cdot G_0}}{4 \cdot k_{on}} \quad (14)$$

$$K_{syn} = k_{ab} \cdot XX_0 + \frac{1}{2}k_{hf} \cdot X_0 \quad (15)$$

$$XX_{0,p} = \frac{V_p}{V_c} \cdot XX_0 \quad (16)$$

**Supplemental Figure S1** Basic goodness-of-fit plots for mechanistic IgG<sub>4</sub> Fab-arm exchange model.

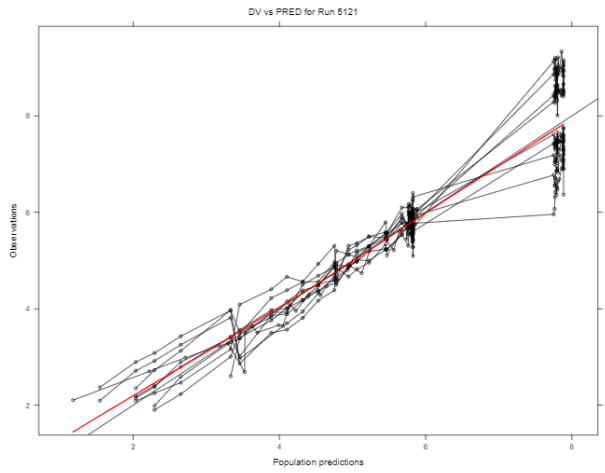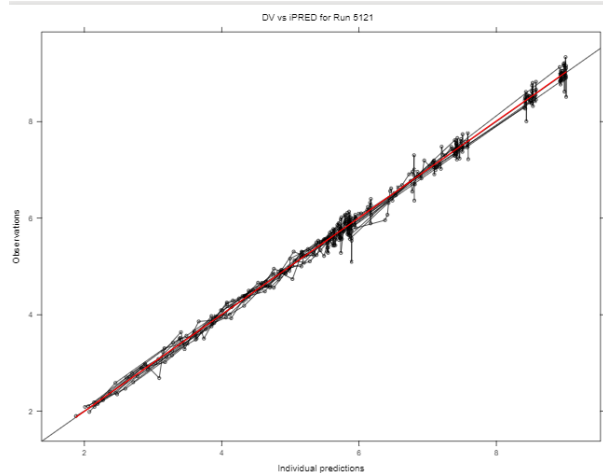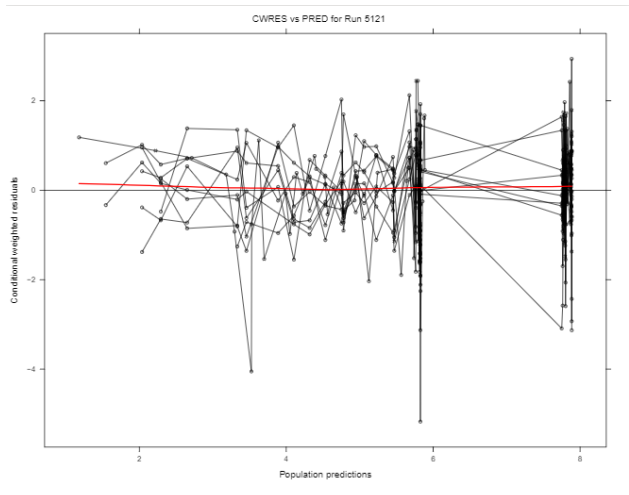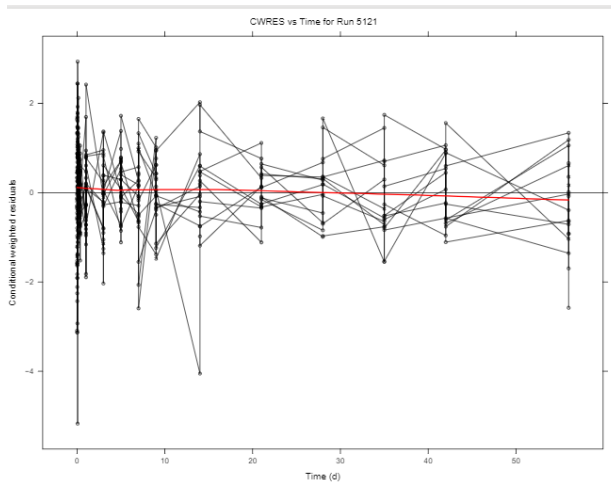

**Supplemental Figure S2** Observed and model-predicted tralokinumab and IgG<sub>4</sub> serum concentration.

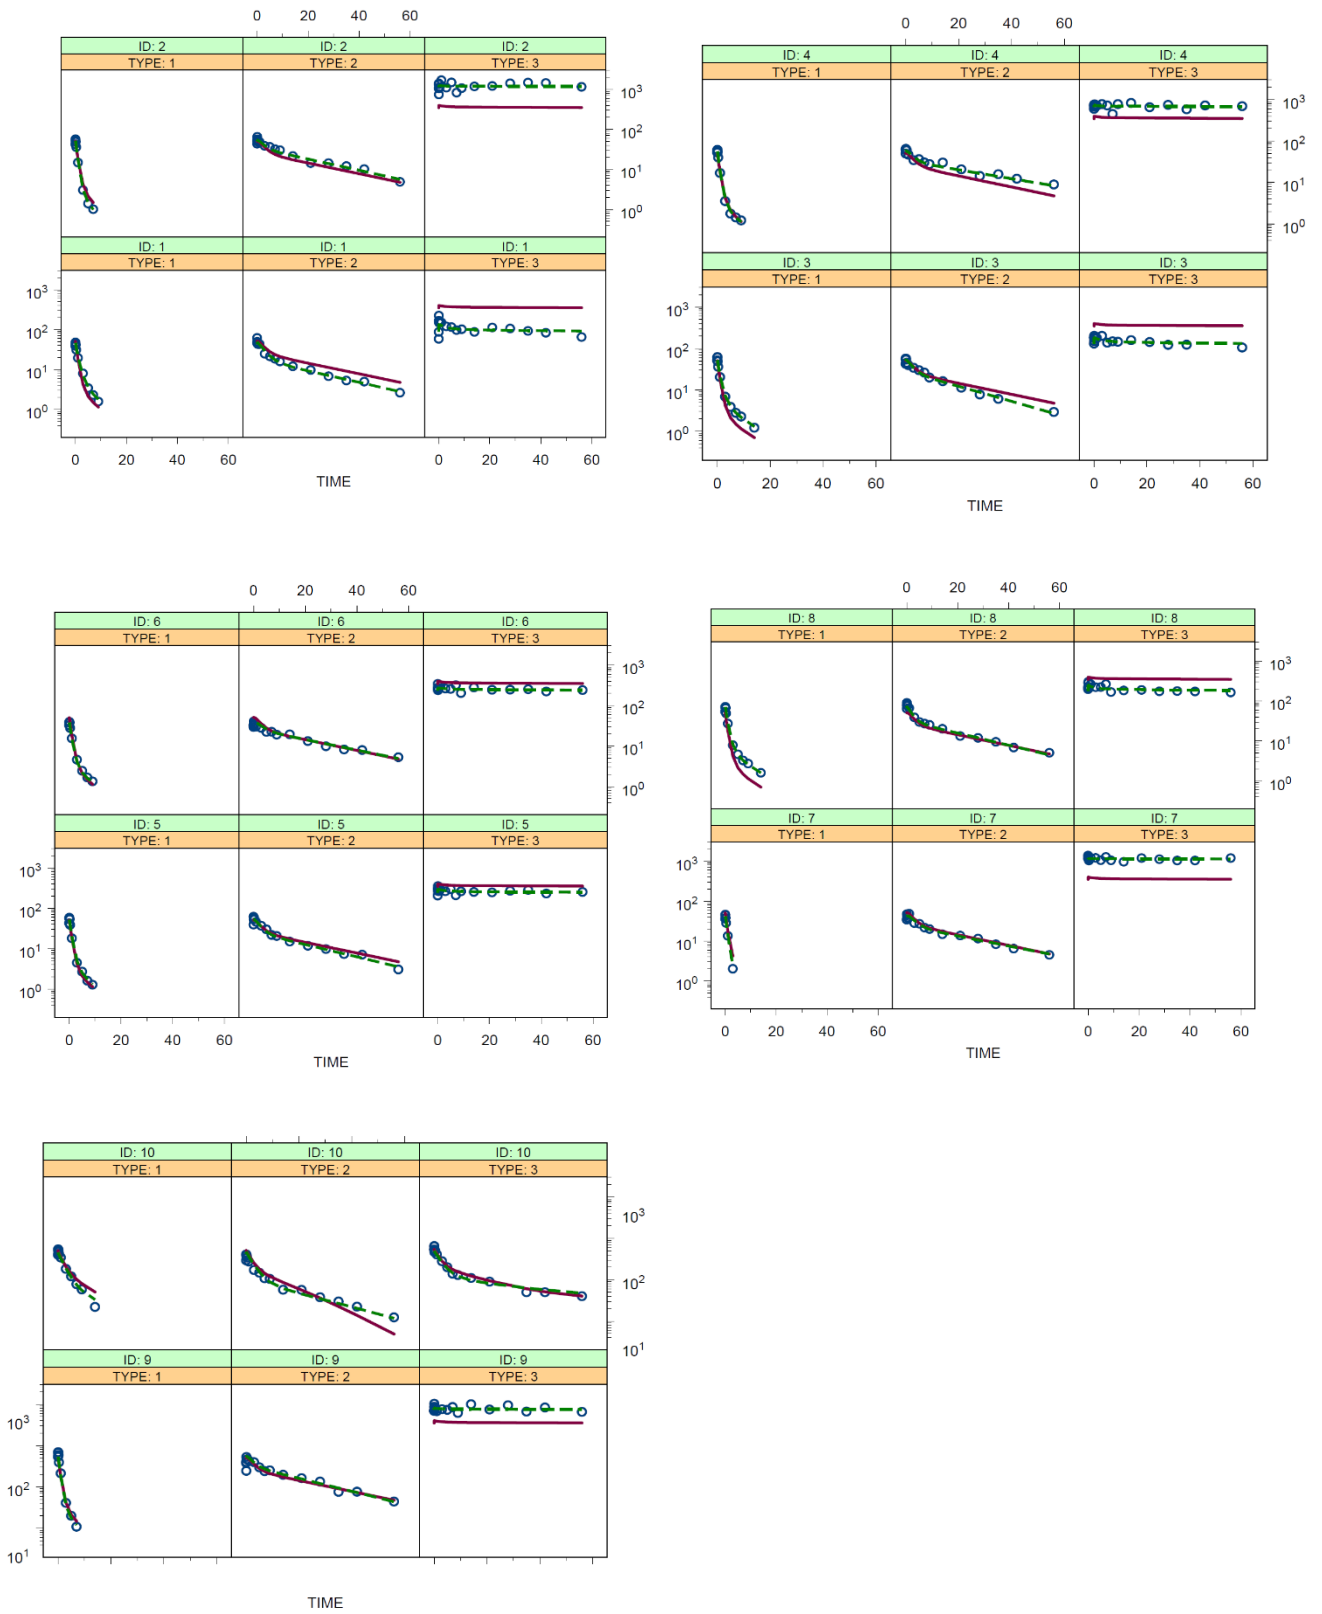

**Supplemental Figure S3** Model-predicted typical half- and hybrid IgG<sub>4</sub> profiles.

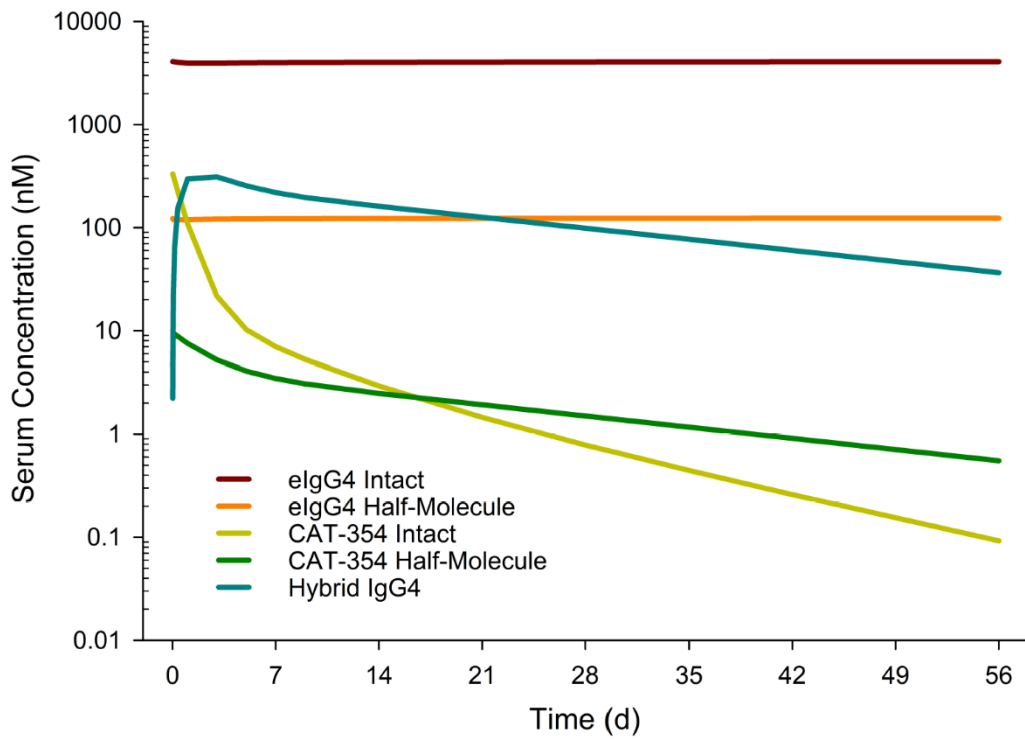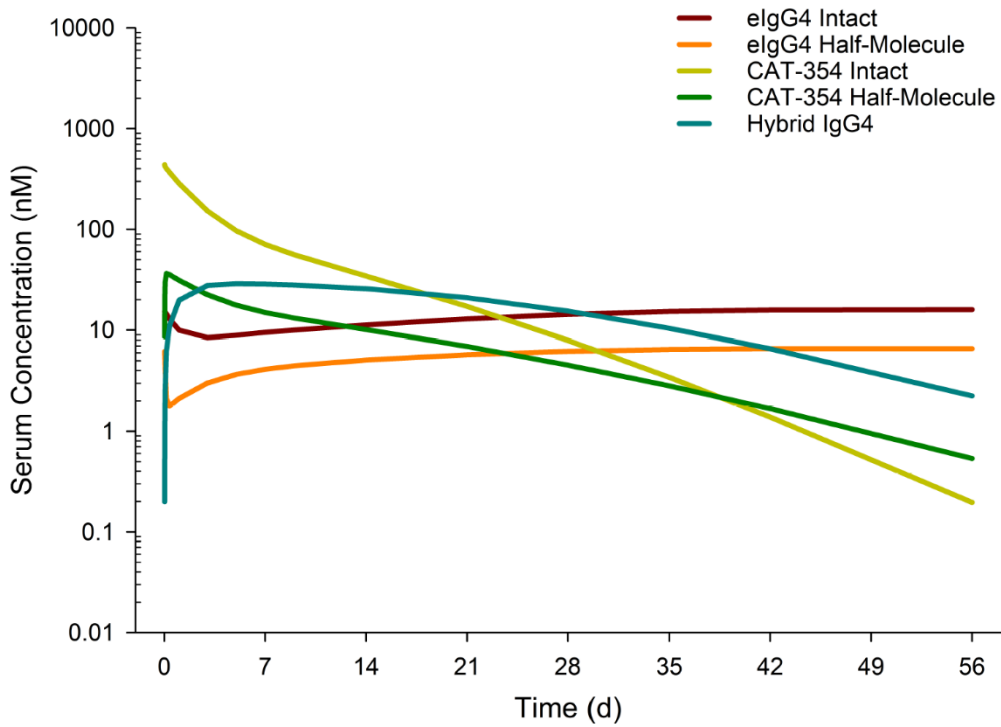

Supplement: PSP4-11-438-s001.pdf [file PSP4-11-438-s001.pdf]
